# Supplementary material
Source: Springer Nature journal article supplement (https://www.springermedizin.de/resource/supplementary/40164_2012_34_MOESM1_ESM.pdf/9687048)

**SP:** signal peptide  
**C2:** Ig-like C2 domain  
**TM:** transmembrane domain

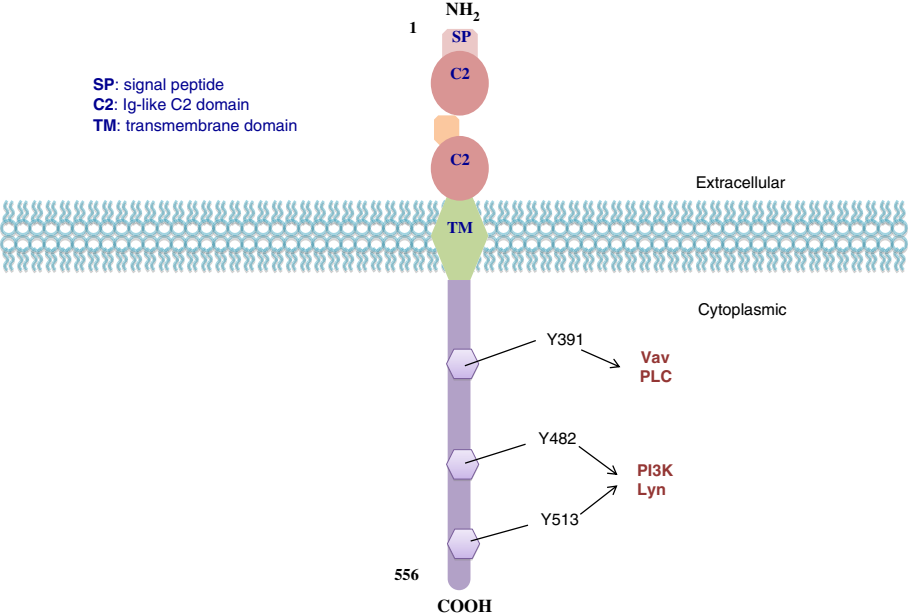

Supplement: MOESM1 [file 9687048]
